# Supplementary material
Source: publisher site journal article supplement (https://www.spandidos-publications.com/8202/downloadSupplementary)
Supplement: Supplementary file 1 [file downloadSupplementary]

## Sheet: Table S1. Target genes
Table SI. Possible targets of myrrh were collected from TCMID and HIT database.
Gene Symbol	Protein Name	DB
ABCB1	P-glycoprotein 1	TCMID
ABCC2	ATP-binding cassette sub-family C member 2	HIT
ANO1	Anoctamin-1	HIT
AR	Androgen Receptor	TCMID
BAK1	Bcl-2 homologous antagonist/killer	HIT
BAX	Apoptosis regulator BAX	HIT
BCHE	Butyrylcholinesterase	TCMID
BCL2L1	Bcl-2-like protein 1	HIT
BIK	Bcl-2-interacting killer	HIT
BMF	Bcl-2-modifying factor	HIT
BOK	Bcl-2-related ovarian killer protein	HIT
CASP3	Caspase-3	HIT
CASP7	Caspase-7	HIT
CASP8	Caspase-8	HIT
CASP9	Caspase-9	HIT
CTSL	Procathepsin L	HIT
CXCL8	Interleukin-8	TCMID
CYP1B1	Cytochrome P450 1B1	HIT
CYP3A4	Cytochrome P450 3A4	TCMID
EGFR	Epidermal growth factor receptor	HIT
ESR1	Estrogen receptor alpha	TCMID
HEXA	Beta-hexosaminidase subunit alpha	HIT
HEXB	Beta-hexosaminidase subunit beta	HIT
HMGCR	3-hydroxy-3-methylglutaryl-coenzyme A reductase	HIT
IFNB1	Interferon beta	HIT
IFNG	Interferon gamma	HIT
IL4	Interleukin-4	HIT
IRF3	Interferon regulatory factor 3	HIT
MAOA	Amine oxidase [flavin-containing] A	HIT
MAOB	Amine oxidase [flavin-containing] B	HIT
MAPK1	MAP kinase ERK2	TCMID
MAPT	Microtubule-associated protein tau	TCMID
MICAL1	[F-actin]-monooxygenase MICAL1	HIT
MPG	DNA-3-methyladenine glycosylase	TCMID
NFE2L2	Nuclear factor erythroid 2-related factor 2	HIT
NFKBIA	NF-kappa-B inhibitor alpha	HIT
NOS2	Nitric oxide synthase, inducible	HIT
PDE5A	Phosphodiesterase 5A	TCMID
PTGS2	Prostaglandin G/H synthase 2	HIT
RELA	Transcription factor p65	HIT, TCMID
RORC	Nuclear receptor ROR-gamma	TCMID
SOD1	Superoxide dismutase [Cu-Zn]	HIT
STAT3	Signal transducer and activator of transcription 3	HIT
TERT	Telomerase reverse transcriptase	TCMID
TLR4	Toll-like receptor 4	HIT
TP53	Cellular tumor antigen p53	HIT
TRPA1	Transient receptor potential cation channel subfamily A member 1	HIT
TRPV1	Transient receptor potential cation channel subfamily V member 1	HIT
TRPV4	Transient receptor potential cation channel subfamily V member 4	HIT
TXNRD1	Thioredoxin reductase 1, cytoplasmic	HIT
UGT1A1	UDP-glucuronosyltransferase 1-1	TCMID

## Sheet: Table S2. KEGG
Table SII. KEGG pathway analysis was conducted by Cytoscape with JEPPETO plugin using possible target genes of myrrh.
Pathways or Process	XD-score	q value
Amyotrophic lateral sclerosis (ALS)	0.62061	6e-05
Apoptosis	0.46412	0
Leishmaniasis	0.41097	0
Pancreatic cancer	0.36627	5e-05
Colorectal cancer	0.3065	0.00218
Small cell lung cancer	0.29864	0.0001
p53 signaling pathway	0.29807	0.00218
ABC transporters	0.29484	0.07096
Cytosolic DNA-sensing pathway	0.29484	0.00433
Other glycan degradation	0.29484	0.34537
Dorso-ventral axis formation	0.29484	0.07096
RIG-I-like receptor signaling pathway	0.25848	0.00146
Epithelial cell signaling in Helicobacter pylori infection	0.25078	0.01389
Prion diseases	0.2377	0.02555
Prostate cancer	0.2295	0.0001
Chagas disease	0.21808	5e-05
Endometrial cancer	0.21484	0.00954
Allograft rejection	0.21484	0.09687
Toll-like receptor signaling pathway	0.20595	0.00014
Chronic myeloid leukemia	0.19919	0.02238
Viral myocarditis	0.19504	0.07096
NOD-like receptor signaling pathway	0.16603	0.01389
Steroid hormone biosynthesis	0.16151	0.44415
Amoebiasis	0.14995	0.01389
Non-small cell lung cancer	0.13014	0.06246
Pathways in cancer	0.11231	0
Shigellosis	0.10913	0.07096
Adipocytokine signaling pathway	0.10537	0.07096
Asthma	0.10537	0.5202
Bladder cancer	0.10537	0.20023
Glioma	0.09484	0.07614
Metabolism of xenobiotics by cytochrome P450	0.09484	0.5202
T cell receptor signaling pathway	0.09092	0.0139
Huntington's disease	0.08947	0.01389
Natural killer cell mediated cytotoxicity	0.08929	0.07096
VEGF signaling pathway	0.08839	0.08067
Regulation of autophagy	0.08532	0.5202
Malaria	0.08532	0.22751
Circadian rhythm - mammal	0.08532	0.5202
Jak-STAT signaling pathway	0.08141	0.03794
Alzheimer's disease	0.076	0.04121
B cell receptor signaling pathway	0.06876	0.10123
Neurotrophin signaling pathway	0.06105	0.02555
Amino sugar and nucleotide sugar metabolism	0.05484	0.56878
Graft-versus-host disease	0.05484	0.56878
Thyroid cancer	0.05484	0.56878
Acute myeloid leukemia	0.04869	0.31596
Arachidonic acid metabolism	0.04869	0.57016
Tryptophan metabolism	0.04869	0.57016
Peroxisome	0.0377	0.34537
Type I diabetes mellitus	0.03277	0.60873
Parkinson's disease	0.02616	0.57665
Melanoma	0.02388	0.39797
Autoimmune thyroid disease	0.01984	0.64361
Base excision repair	0.01984	0.64361
Fc epsilon RI signaling pathway	0.01792	0.42121
Adherens junction	0.00913	0.44415
Intestinal immune network for IgA production	0.00595	0.70203
Arginine and proline metabolism	0.00295	0.70812
MAPK signaling pathway	0.00214	0.21316
Aldosterone-regulated sodium reabsorption	0.00011	0.71389
TGF-beta signaling pathway	-0.00389	0.5202
Gap junction	-0.00516	0.5202
Proteasome	-0.0076	0.75033
GnRH signaling pathway	-0.00877	0.5202
ErbB signaling pathway	-0.00992	0.5202
Chemokine signaling pathway	-0.01104	0.24482
Type II diabetes mellitus	-0.01213	0.76979
Basal cell carcinoma	-0.01425	0.77371
Protein processing in endoplasmic reticulum	-0.01803	0.4425
Pathogenic Escherichia coli infection	-0.02005	0.80565
Oocyte meiosis	-0.02005	0.56878
mTOR signaling pathway	-0.02352	0.82215
Antigen processing and presentation	-0.02516	0.82453
Cytokine-cytokine receptor interaction	-0.03373	0.44415
Long-term depression	-0.03498	0.89111
Long-term potentiation	-0.04166	0.95019
Systemic lupus erythematosus	-0.04545	0.98112
Renal cell carcinoma	-0.04633	0.98112
Lysosome	-0.05182	1
Calcium signaling pathway	-0.05252	0.86884
Progesterone-mediated oocyte maturation	-0.05452	1
Hematopoietic cell lineage	-0.05516	1
Fc gamma R-mediated phagocytosis	-0.05638	1
Melanogenesis	-0.05638	1
Vascular smooth muscle contraction	-0.06021	1
Focal adhesion	-0.06095	1
Regulation of actin cytoskeleton	-0.06238	1
Purine metabolism	-0.06879	1
Axon guidance	-0.06912	1
Phagosome	-0.07067	1
Cell cycle	-0.07182	1
Insulin signaling pathway	-0.07264	1
Wnt signaling pathway	-0.07391	1
Endocytosis	-0.08206	1
Metabolic pathways	-0.08641	1
Neuroactive ligand-receptor interaction	-0.08646	1
Bacterial invasion of epithelial cells	-0.10342	1
Ubiquitin mediated proteolysis	-0.10422	1
Drug metabolism - other enzymes	-0.10516	1
Primary immunodeficiency	-0.10516	1
Cell adhesion molecules (CAMs)	-0.10516	1
Arrhythmogenic right ventricular cardiomyopathy (ARVC)	-0.10516	1
Tight junction	-0.10516	1
Oxidative phosphorylation	-0.10516	1
Cardiac muscle contraction	-0.10516	1
Glycerophospholipid metabolism	-0.10516	1
Ether lipid metabolism	-0.10516	1
Linoleic acid metabolism	-0.10516	1
Glycosylphosphatidylinositol(GPI)-anchor biosynthesis	-0.10516	1
Leukocyte transendothelial migration	-0.10516	1
Aminoacyl-tRNA biosynthesis	-0.10516	1
PPAR signaling pathway	-0.10516	1
Spliceosome	-0.10516	1
Homologous recombination	-0.10516	1
Non-homologous end-joining	-0.10516	1
Nicotinate and nicotinamide metabolism	-0.10516	1
Lysine degradation	-0.10516	1
Retinol metabolism	-0.10516	1
N-Glycan biosynthesis	-0.10516	1
RNA degradation	-0.10516	1
Pyrimidine metabolism	-0.10516	1
Nucleotide excision repair	-0.10516	1
SNARE interactions in vesicular transport	-0.10516	1
Collecting duct acid secretion	-0.10516	1
Vibrio cholerae infection	-0.10516	1
ECM-receptor interaction	-0.10516	1
Glycolysis / Gluconeogenesis	-0.10516	1
Glycerolipid metabolism	-0.10516	1
Cysteine and methionine metabolism	-0.10516	1
Hypertrophic cardiomyopathy (HCM)	-0.10516	1
Dilated cardiomyopathy	-0.10516	1
Phosphatidylinositol signaling system	-0.10516	1
Inositol phosphate metabolism	-0.10516	1
Fatty acid metabolism	-0.10516	1
Valine, leucine and isoleucine degradation	-0.10516	1
Vasopressin-regulated water reabsorption	-0.10516	1
DNA replication	-0.10516	1
Sphingolipid metabolism	-0.10516	1
One carbon pool by folate	-0.10516	1
RNA polymerase	-0.10516	1
Basal transcription factors	-0.10516	1
Notch signaling pathway	-0.10516	1
Salivary secretion	-0.10516	1
Gastric acid secretion	-0.10516	1
Mismatch repair	-0.10516	1
Starch and sucrose metabolism	-0.10516	1
Porphyrin and chlorophyll metabolism	-0.10516	1
Drug metabolism - cytochrome P450	-0.10516	1
Complement and coagulation cascades	-0.10516	1
Selenoamino acid metabolism	-0.10516	1
Glyoxylate and dicarboxylate metabolism	-0.10516	1
Olfactory transduction	-0.10516	1
Pyruvate metabolism	-0.10516	1
Protein export	-0.10516	1
Biosynthesis of unsaturated fatty acids	-0.10516	1
Proximal tubule bicarbonate reclamation	-0.10516	1
Glycine, serine and threonine metabolism	-0.10516	1
Taste transduction	-0.10516	1
Ribosome	-0.10516	1
O-Glycan biosynthesis	-0.10516	1
Nitrogen metabolism	-0.10516	1
Tyrosine metabolism	-0.10516	1
Butanoate metabolism	-0.10516	1
Glutathione metabolism	-0.10516	1
Renin-angiotensin system	-0.10516	1
Hedgehog signaling pathway	-0.10516	1
Alanine, aspartate and glutamate metabolism	-0.10516	1
Phototransduction	-0.10516	1
Citrate cycle (TCA cycle)	-0.10516	1
Propanoate metabolism	-0.10516	1
Maturity onset diabetes of the young	-0.10516	1
beta-Alanine metabolism	-0.10516	1
Fructose and mannose metabolism	-0.10516	1
Pentose phosphate pathway	-0.10516	1
Galactose metabolism	-0.10516	1
Riboflavin metabolism	-0.10516	1

## Sheet: Table S3. Biocarta
Table SIII. Biocarta pathway analysis was conducted by Cytoscape with JEPPETO plugin using possible target genes of myrrh.
Pathways or Process	XD-score	q value
Role of Mitochondria in Apoptotic Signaling	1.98624	0
Apoptotic Signaling in Response to DNA Damage	1.47543	0.00026
D4-GDI Signaling Pathway	1.18654	0.06028
Stress Induction of HSP Regulation	0.77842	0.27472
Induction of apoptosis through DR3 and DR4/5 Death Receptors	0.77431	0.01143
B Cell Survival Pathway	0.76987	0.27472
Caspase Cascade in Apoptosis	0.76987	0.04132
Regulation of BAD phosphorylation	0.72049	0.13903
Dendritic cells in regulating TH1 and TH2 Development	0.53177	0.04132
Erythropoietin mediated neuroprotection through NF-kB	0.49714	0.24912
Role of ERBB2 in Signal Transduction and Oncology	0.49714	0.04143
The 4-1BB-dependent immune response	0.47575	0.13416
Cytokine Network	0.40145	0.13903
Chaperones modulate interferon Signaling Pathway	0.40145	0.13903
Ras Signaling Pathway	0.38892	0.47189
Acetylation and Deacetylation of RelA in The Nucleus	0.38525	0.27472
FAS signaling pathway ( CD95 )	0.37701	0.24912
Telomeres, Telomerase, Cellular Aging, and Immortality	0.37543	0.14804
Ceramide Signaling Pathway	0.34659	0.14804
Cadmium induces DNA synthesis and proliferation in macrophages	0.3413	0.30384
NF-kB Signaling Pathway	0.3413	0.14804
Trefoil Factors Initiate Mucosal Healing	0.31532	0.15825
p53 Signaling Pathway	0.27681	0.3492
Sprouty regulation of tyrosine kinase signals	0.26987	0.3492
Role of Tob in T-cell activation	0.26987	0.3492
HIV-I Nef: negative effector of Fas and TNF	0.26224	0.12557
TNFR1 Signaling Pathway	0.25135	0.59032
Influence of Ras and Rho proteins on G1 to S Transition	0.24987	0.20061
Hypoxia and p53 in the Cardiovascular system	0.24987	0.20061
Oxidative Stress Induced Gene Expression Via Nrf2	0.24046	0.36503
ATM Signaling Pathway	0.19092	0.43227
GATA3 participate in activating the Th2 cytokine genes expression	0.16987	0.81237
BTG family proteins and cell cycle regulation	0.16987	0.81237
Erk1/Erk2 Mapk Signaling pathway	0.16987	0.26834
Cytokines and Inflammatory Response	0.16987	0.26834
AKT Signaling Pathway	0.15082	0.47189
Nuclear Receptors in Lipid Metabolism and Toxicity	0.15082	0.47189
CBL mediated ligand-induced downregulation of EGF receptors	0.13351	0.81237
Map Kinase Inactivation of SMRT Corepressor	0.13351	0.81237
IL 4 signaling pathway	0.13351	0.81237
Downregulated of MTA-3 in ER-negative Breast Tumors	0.13351	0.81237
NFkB activation by Nontypeable Hemophilus influenzae	0.1177	0.53744
Prion Pathway	0.11246	0.81237
Tumor Suppressor Arf Inhibits Ribosomal Biogenesis	0.1032	0.81237
Phosphorylation of MEK1 by cdk5/p35 down regulates the MAP kinase pathway	0.1032	0.81237
NO2-dependent IL 12 Pathway in NK cells	0.1032	0.81237
RB Tumor Suppressor/Checkpoint Signaling in response to DNA damage	0.1032	0.81237
Th1/Th2 Differentiation	0.1032	0.56252
fMLP induced chemokine gene expression in HMC-1 cells	0.08987	0.5813
Keratinocyte Differentiation	0.08858	0.3618
EGF Signaling Pathway	0.07756	0.5813
Eicosanoid Metabolism	0.07756	0.81237
Signal transduction through IL1R	0.07756	0.5813
Selective expression of chemokine receptors during T-cell polarization	0.07756	0.5813
Bone Remodelling	0.07756	0.81237
Agrin in Postsynaptic Differentiation	0.06617	0.59032
Angiotensin II mediated activation of JNK Pathway via Pyk2 dependent signaling	0.05558	0.61269
Role of nicotinic acetylcholine receptors in the regulation of apoptosis	0.05558	0.81237
Role of ?-arrestins in the activation and targeting of MAP kinases	0.05558	0.81237
CD40L Signaling Pathway	0.05558	0.81237
Role of Erk5 in Neuronal Survival	0.05558	0.81237
Adhesion and Diapedesis of Granulocytes	0.05558	0.81237
Human Cytomegalovirus and Map Kinase Pathways	0.05558	0.81237
IL 5 Signaling Pathway	0.05558	0.81237
Neuropeptides VIP and PACAP inhibit the apoptosis of activated T cells	0.05558	0.81237
mCalpain and friends in Cell motility	0.03654	0.83601
Regulation of hematopoiesis by cytokines	0.03654	0.83601
IL-2 Receptor Beta Chain in T cell Activation	0.03019	1
Bioactive Peptide Induced Signaling Pathway	0.02793	0.70691
Thrombin signaling and protease-activated receptors	0.01987	0.83601
Antigen Dependent B Cell Activation	0.01987	0.83601
Role of EGF Receptor Transactivation by GPCRs in Cardiac Hypertrophy	0.01987	0.83601
Regulation of transcriptional activity by PML	0.01987	0.83601
Toll-Like Receptor Pathway	0.01987	0.7275
Signaling of Hepatocyte Growth Factor Receptor	0.00516	0.7834
TNFR2 Signaling Pathway	0.00516	0.85856
Role of MAL in Rho-Mediated Activation of SRF	-0.00791	0.85856
PTEN dependent cell cycle arrest and apoptosis	-0.00791	0.85856
Role of BRCA1, BRCA2 and ATR in Cancer Susceptibility	-0.0196	0.85856
Roles of ?-arrestin-dependent Recruitment of Src Kinases in GPCR Signaling	-0.0196	0.85856
Transcription factor CREB and its extracellular signals	-0.0196	0.85856
CTCF: First Multivalent Nuclear Factor	-0.0196	0.85856
Multiple antiapoptotic pathways from IGF-1R signaling lead to BAD phosphorylation	-0.0196	0.85856
Aspirin Blocks Signaling Pathway Involved in Platelet Activation	-0.0196	0.85856
TPO Signaling Pathway	-0.03013	0.86342
Regulation of eIF4e and p70 S6 Kinase	-0.03013	0.86342
IL 6 signaling pathway	-0.03013	0.86342
Mechanism of Gene Regulation by Peroxisome Proliferators via PPARa(alpha)	-0.03501	0.81237
CARM1 and Regulation of the Estrogen Receptor	-0.03965	0.87694
Erk and PI-3 Kinase Are Necessary for Collagen Binding in Corneal Epithelia	-0.03965	0.87694
CCR3 signaling in Eosinophils	-0.04831	0.87947
IL12 and Stat4 Dependent Signaling Pathway in Th1 Development	-0.04831	0.87947
CXCR4 Signaling Pathway	-0.04831	0.87947
Phospholipids as signalling intermediaries	-0.05622	0.89052
Cell Cycle: G2/M Checkpoint	-0.05622	0.89052
TNF/Stress Related Signaling	-0.06346	0.90993
PDGF Signaling Pathway	-0.07013	0.92829
Links between Pyk2 and Map Kinases	-0.07628	0.94564
Cell Cycle: G1/S Check Point	-0.08198	0.95231
Inactivation of Gsk3 by AKT causes accumulation of b-catenin in Alveolar Macrophages	-0.08198	0.95231
Fc Epsilon Receptor I Signaling in Mast Cells	-0.1011	1
Integrin Signaling Pathway	-0.10555	1
NFAT and Hypertrophy of the heart (Transcription in the broken heart)	-0.11584	1
T Cell Receptor Signaling Pathway	-0.12202	1
MAPKinase Signaling Pathway	-0.12886	1
IL-7 Signal Transduction	-0.22219	1
Actions of Nitric Oxide in the Heart	-0.22272	1
Activation of Csk by cAMP-dependent Protein Kinase Inhibits Signaling through the T Cell Receptor	-0.23013	1
Pertussis toxin-insensitive CCR5 Signaling in Macrophage	-0.23013	1
Cells and Molecules involved in local acute inflammatory response	-0.23013	1
Lissencephaly gene (LIS1) in neuronal migration and development	-0.23013	1
Synaptic Proteins at the Synaptic Junction	-0.23013	1
Y branching of actin filaments	-0.23013	1
Hemoglobin's Chaperone	-0.23013	1
AKAP95 role in mitosis and chromosome dynamics	-0.23013	1
Protein Kinase A at the Centrosome	-0.23013	1
ALK in cardiac myocytes	-0.23013	1
Acute Myocardial Infarction	-0.23013	1
ADP-Ribosylation Factor	-0.23013	1
?-arrestins in GPCR Desensitization	-0.23013	1
Bystander B Cell Activation	-0.23013	1
BCR Signaling Pathway	-0.23013	1
B Lymphocyte Cell Surface Molecules	-0.23013	1
Effects of calcineurin in Keratinocyte Differentiation	-0.23013	1
Cell to Cell Adhesion Signaling	-0.23013	1
Cyclins and Cell Cycle Regulation	-0.23013	1
ChREBP regulation by carbohydrates and cAMP	-0.23013	1
Regulation of ck1/cdk5 by type 1 glutamate receptors	-0.23013	1
Classical Complement Pathway	-0.23013	1
Complement Pathway	-0.23013	1
CTL mediated immune response against target cells	-0.23013	1
The Co-Stimulatory Signal During T-cell Activation	-0.23013	1
Regulation of eIF2	-0.23013	1
The Role of Eosinophils in the Chemokine Network of Allergy	-0.23013	1
Eph Kinases and ephrins support platelet aggregation	-0.23013	1
EPO Signaling Pathway	-0.23013	1
ER?associated degradation (ERAD) Pathway	-0.23013	1
Erythrocyte Differentiation Pathway	-0.23013	1
METS affect on Macrophage Differentiation	-0.23013	1
Extrinsic Prothrombin Activation Pathway	-0.23013	1
Fibrinolysis Pathway	-0.23013	1
Corticosteroids and cardioprotection	-0.23013	1
Growth Hormone Signaling Pathway	-0.23013	1
Ghrelin: Regulation of Food Intake and Energy Homeostasis	-0.23013	1
Inhibition of Cellular Proliferation by Gleevec	-0.23013	1
Glycolysis Pathway	-0.23013	1
Signaling Pathway from G-Protein Families	-0.23013	1
Chromatin Remodeling by hSWI/SNF ATP-dependent Complexes	-0.23013	1
Control of skeletal myogenesis by HDAC & calcium/calmodulin-dependent kinase (CaMK)	-0.23013	1
Segmentation Clock	-0.23013	1
Hypoxia-Inducible Factor in the Cardiovascular System	-0.23013	1
IGF-1 Signaling Pathway	-0.23013	1
Skeletal muscle hypertrophy is regulated via AKT/mTOR pathway	-0.23013	1
IL 17 Signaling Pathway	-0.23013	1
IL 2 signaling pathway	-0.23013	1
IL 3 signaling pathway	-0.23013	1
Insulin Signaling Pathway	-0.23013	1
Intrinsic Prothrombin Activation Pathway	-0.23013	1
Lectin Induced Complement Pathway	-0.23013	1
The IGF-1 Receptor and Longevity	-0.23013	1
Adhesion and Diapedesis of Lymphocytes	-0.23013	1
How Progesterone Initiates the Oocyte Maturation	-0.23013	1
mTOR Signaling Pathway	-0.23013	1
Role of MEF2D in T-cell Apoptosis	-0.23013	1
Antigen Processing and Presentation	-0.23013	1
Monocyte and its Surface Molecules	-0.23013	1
PKC-catalyzed phosphorylation of inhibitory phosphoprotein of myosin phosphatase	-0.23013	1
Nerve growth factor pathway (NGF)	-0.23013	1
Ras-Independent pathway in NK cell-mediated cytotoxicity	-0.23013	1
Regulation of p27 Phosphorylation during Cell Cycle Progression	-0.23013	1
p38 MAPK Signaling Pathway	-0.23013	1
Regulation of PGC-1a	-0.23013	1
Multi-step Regulation of Transcription by Pitx2	-0.23013	1
The PRC2 Complex Sets Long-term Gene Silencing Through Modification of Histone Tails	-0.23013	1
Presenilin action in Notch and Wnt signaling	-0.23013	1
Phosphoinositides and their downstream targets.	-0.23013	1
Rab GTPases Mark Targets In The Endocytotic Machinery	-0.23013	1
Rac 1 cell motility signaling pathway	-0.23013	1
Role of Ran in mitotic spindle regulation	-0.23013	1
Sumoylation by RanBP2 Regulates Transcriptional Repression	-0.23013	1
Nuclear receptors coordinate the activities of chromatin remodeling complexes and coactivators to facilitate initiation of transcription in carcinoma cells	-0.23013	1
Inhibition of Matrix Metalloproteinases	-0.23013	1
Rho cell motility signaling pathway	-0.23013	1
Granzyme A mediated Apoptosis Pathway	-0.23013	1
Sonic Hedgehog (Shh) Pathway	-0.23013	1
E2F1 Destruction Pathway	-0.23013	1
Spliceosomal Assembly	-0.23013	1
Stathmin and breast cancer resistance to antimicrotubule agents	-0.23013	1
TACI and BCMA stimulation of B cell immune responses.	-0.23013	1
HIV Induced T Cell Apoptosis	-0.23013	1
Lck and Fyn tyrosine kinases in initiation of TCR Activation	-0.23013	1
T Cytotoxic Cell Surface Molecules	-0.23013	1
TGF beta signaling pathway	-0.23013	1
T Helper Cell Surface Molecules	-0.23013	1
Trka Receptor Signaling Pathway	-0.23013	1
uCalpain and friends in Cell spread	-0.23013	1
Control of Gene Expression by Vitamin D Receptor	-0.23013	1
VEGF, Hypoxia, and Angiogenesis	-0.23013	1
WNT Signaling Pathway	-0.23013	1

## Sheet: Table S4. GOBP
Table SIV. GO biological pathway analysis was conducted by Cytoscape with JEPPETO plugin using possible target genes of myrrh.
Pathways or Process	XD-score	q value
regulation of mitochondrial membrane potential	2.04622	2e-05
regulation of mitochondrial membrane permeability	1.8543	3e-05
release of cytochrome c from mitochondria	1.55945	0
positive regulation of release of cytochrome c from mitochondria	1.26844	0
B cell homeostasis	1.25135	0.00131
induction of apoptosis by intracellular signals	1.03299	0
vagina development	1.02602	0.00094
fertilization	1.01844	0.02889
apoptotic mitochondrial changes	0.93511	0.03183
negative regulation of peptidyl-serine phosphorylation	0.74622	0.02162
replicative senescence	0.73511	0.02162
apoptotic DNA fragmentation	0.70783	0.00482
positive regulation of nitric oxide biosynthetic process	0.70434	2e-05
response to exogenous dsRNA	0.68511	0.00238
homeostasis of number of cells	0.66238	0.02484
response to salt stress	0.66238	0.02484
response to tumor necrosis factor	0.65733	0.04976
positive regulation of type I interferon production	0.64099	0.0028
positive regulation of neuron apoptotic process	0.593	0.0001
induction of apoptosis via death domain receptors	0.57796	0.40101
neuron apoptotic process	0.56885	0.00762
protein import into nucleus, translocation	0.56669	0.00337
cellular response to UV	0.56669	0.00337
negative regulation of osteoclast differentiation	0.55049	0.03183
positive regulation of interleukin-10 production	0.55049	0.03183
negative regulation of protein catabolic process	0.53511	0.00376
response to UV	0.53511	0.00105
lipopolysaccharide-mediated signaling pathway	0.5277	0.00058
positive regulation of intrinsic apoptotic signaling pathway	0.51447	0.03609
regulation of neuron apoptotic process	0.50654	0.03609
T cell homeostasis	0.50455	0.40971
negative regulation of cyclin-dependent protein kinase activity	0.49761	0.40971
regulation of inflammatory response	0.48683	0.00067
defense response to Gram-negative bacterium	0.46844	0.03859
superoxide metabolic process	0.46844	0.03859
regulation of the force of heart contraction	0.46844	0.03859
positive regulation of interferon-beta production	0.46844	0.03859
cellular response to organic substance	0.45955	0.07909
germ cell development	0.45511	0.07909
activation of pro-apoptotic gene products	0.45482	0.0008
positive regulation of calcium ion transport into cytosol	0.44205	0.04153
response to bacterium	0.43511	0.00565
adaptive immune response	0.43511	0.04153
mammary gland alveolus development	0.43511	0.04153
positive regulation of vasoconstriction	0.41223	0.04493
ovarian follicle development	0.41042	0.01564
sex differentiation	0.40569	0.04493
response to gamma radiation	0.37161	0.00811
protein processing	0.36844	0.10477
cellular component disassembly involved in apoptotic process	0.36368	0.00325
negative regulation of fibroblast proliferation	0.35616	0.05226
positive regulation of reactive oxygen species metabolic process	0.35616	0.05226
limb morphogenesis	0.35616	0.05226
response to cytokine stimulus	0.33546	0.00072
lymph node development	0.33511	0.38436
removal of superoxide radicals	0.33511	0.38436
oogenesis	0.33511	0.38436
protein tetramerization	0.33511	0.05677
positive regulation of cellular protein metabolic process	0.33511	0.38436
determination of adult lifespan	0.33511	0.38436
T-helper 1 type immune response	0.33511	0.38436
positive regulation of interleukin-12 production	0.33511	0.05677
prostaglandin biosynthetic process	0.33511	0.38436
regulation of embryonic development	0.33511	0.38436
salivary gland morphogenesis	0.33511	0.38436
positive regulation of blood coagulation	0.33511	0.38436
positive regulation of tumor necrosis factor biosynthetic process	0.33511	0.38436
hypothalamus development	0.33511	0.38436
telomere maintenance via telomerase	0.33511	0.38436
positive regulation of insulin-like growth factor receptor signaling pathway	0.33511	0.38436
uterus development	0.33511	0.38436
hippo signaling cascade	0.32641	0.48301
gastrulation	0.31606	0.06136
glycosphingolipid metabolic process	0.31606	0.06136
male gonad development	0.3099	0.0009
response to folic acid	0.30884	0.38921
nucleotide-binding domain, leucine rich repeat containing receptor signaling pathway	0.2993	0.14001
JAK-STAT cascade involved in growth hormone signaling pathway	0.29874	0.06543
positive regulation of membrane protein ectodomain proteolysis	0.29874	0.38921
positive regulation of nitric-oxide synthase activity	0.29874	0.38921
nitric oxide biosynthetic process	0.29874	0.38921
I-kappaB phosphorylation	0.29874	0.38921
temperature homeostasis	0.29874	0.38921
negative regulation of T cell activation	0.29874	0.38921
skeletal muscle contraction	0.29874	0.38921
positive regulation of cytokine production	0.29874	0.38921
cell-cell junction assembly	0.29874	0.38921
positive regulation of T cell differentiation	0.29874	0.38921
superoxide anion generation	0.29874	0.38921
immunoglobulin mediated immune response	0.29874	0.38921
lipid storage	0.2777	0.39321
response to acid	0.2777	0.39321
cell aging	0.27307	0.07561
natural killer cell activation	0.26844	0.39321
DNA damage response, signal transduction by p53 class mediator resulting in transcription of p21 class mediator	0.26844	0.39321
negative regulation of Notch signaling pathway	0.26844	0.39321
regulation of phosphorylation	0.26844	0.39321
positive regulation of survival gene product expression	0.26844	0.39321
rRNA transcription	0.26844	0.39321
response to fatty acid	0.26844	0.39321
cellular response to glucose starvation	0.26844	0.39321
labyrinthine layer blood vessel development	0.26844	0.39321
positive regulation of phosphorylation	0.26844	0.07561
membrane protein intracellular domain proteolysis	0.26844	0.39321
regulation of cytoskeleton organization	0.26844	0.39321
activation of cysteine-type endopeptidase activity involved in apoptotic process	0.26387	0.00012
MyD88-independent toll-like receptor signaling pathway	0.26298	0.00067
growth	0.2605	0.55186
intracellular receptor mediated signaling pathway	0.25943	0.01642
defense response to virus	0.25733	0.00334
defense response to bacterium	0.25511	0.00334
response to axon injury	0.25511	0.07909
regulation of multicellular organism growth	0.25511	0.07909
B cell proliferation	0.25135	0.39832
intracellular estrogen receptor signaling pathway	0.2428	0.39832
cytoplasmic sequestering of transcription factor	0.2428	0.39832

## Sheet: Table S5. GOMF
Table SV. GO molecular function analysis was conducted by Cytoscape with JEPPETO plugin using possible target genes of myrrh.
Pathways or Process	XD-score	q value
aspartic-type endopeptidase activity	0.96148	0.04296
cyclin-dependent protein kinase inhibitor activity	0.77966	0.50072
cytokine receptor binding	0.57686	0.04296
NADP binding	0.56148	0.00575
steroid binding	0.53291	0.0472
monooxygenase activity	0.46148	0.05862
cysteine-type endopeptidase activity	0.42814	0.00471
cysteine-type peptidase activity	0.40829	0.00471
NF-kappaB binding	0.40592	0.06723
ligand-activated sequence-specific DNA binding RNA polymerase II transcription factor activity	0.39391	0.00271
lipopolysaccharide binding	0.36148	0.50072
3',5'-cyclic-nucleotide phosphodiesterase activity	0.36148	0.50072
core promoter sequence-specific DNA binding	0.36148	0.50072
RNA polymerase II transcription factor binding	0.34243	0.08731
regulatory region DNA binding	0.32511	0.50072
ATPase activity, coupled to transmembrane movement of substances	0.3093	0.10003
apolipoprotein binding	0.29481	0.5223
protein phosphatase 2A binding	0.27772	0.52759
cation binding	0.26917	0.52759
phosphotyrosine binding	0.24719	0.52759
histone acetyltransferase binding	0.24719	0.52759
peptidase activity	0.23421	0.0194
chaperone binding	0.23421	0.03533
MAP kinase activity	0.22814	0.52759
RNA polymerase II carboxy-terminal domain kinase activity	0.22814	0.52759
alpha-tubulin binding	0.22814	0.52759
peroxidase activity	0.22814	0.52759
steroid hormone receptor activity	0.22235	0.03755
mitogen-activated protein kinase kinase kinase binding	0.21148	0.5431
hydrolase activity, hydrolyzing O-glycosyl compounds	0.19677	0.55748
calcium channel activity	0.19677	0.20585
hormone binding	0.19677	0.55748
protein disulfide oxidoreductase activity	0.1837	0.55825
oxygen binding	0.1837	0.55825
MAP kinase kinase kinase activity	0.172	0.55825
tubulin binding	0.172	0.55825
activating transcription factor binding	0.172	0.55825
copper ion binding	0.16661	0.23585
heme binding	0.16148	0.0607
cation channel activity	0.16148	0.57004
phosphatidylinositol 3-kinase binding	0.16148	0.57004
heat shock protein binding	0.1566	0.23585
flavin adenine dinucleotide binding	0.1566	0.23585
beta-tubulin binding	0.15195	0.58903
coenzyme binding	0.1433	0.59928
repressing transcription factor binding	0.13539	0.6169
protein dimerization activity	0.13352	0.03267
damaged DNA binding	0.12814	0.28681
enzyme binding	0.127	0.00055
identical protein binding	0.12202	0.00019
tumor necrosis factor receptor binding	0.12148	0.65045
beta-amyloid binding	0.12148	0.65045
oxidoreductase activity, acting on paired donors, with incorporation or reduction of molecular oxygen	0.11532	0.66642
beta-catenin binding	0.10693	0.3419
phosphatase binding	0.10433	0.70557
protein heterodimerization activity	0.10343	0.00271
actin filament binding	0.10183	0.35531
transcription regulatory region DNA binding	0.10037	0.02089
SH2 domain binding	0.09481	0.72542

## Sheet: Table S6. GOCC
Table SVI. GO cellular components analysis was conducted by Cytoscape with JEPPETO plugin using possible target genes of myrrh.
Pathways or Process	XD-score	q value
dendrite cytoplasm	0.63224	0.0724
mitochondrial membrane	0.45794	0.00103
mitochondrial outer membrane	0.3536	0.00174
pseudopodium	0.32921	0.61479
axon part	0.2989	0.61479
replication fork	0.2989	0.61479
mitochondrial envelope	0.27326	0.6424
acrosomal vesicle	0.23224	0.24712
chromatin remodeling complex	0.23224	0.71415
lysosomal lumen	0.20086	0.75348
perikaryon	0.18779	0.32247
cortical actin cytoskeleton	0.1761	0.75348
cilium axoneme	0.16557	0.75348
transcription factor TFIID complex	0.16557	0.75348
T-tubule	0.13948	0.78588
insoluble fraction	0.13578	0.42891
cell body	0.11941	0.81428
chromosome, telomeric region	0.11941	0.81428
cortical cytoskeleton	0.11941	0.81428
caveola	0.11861	0.50386
PML body	0.10116	0.53423
nuclear membrane	0.10073	0.75133
peroxisome	0.0989	0.53423
cytoplasmic microtubule	0.0946	0.90152
nuclear body	0.0946	0.90152
microtubule associated complex	0.09057	0.91
protein complex	0.08625	0.0025
chromatin	0.08322	0.56663
endocytic vesicle	0.08322	0.92564
adherens junction	0.07985	0.93149
endoplasmic reticulum lumen	0.07824	0.56663
growth cone	0.07824	0.56663
myosin complex	0.07668	0.93149
nuclear chromatin	0.07668	0.56663
filopodium	0.07368	0.93149
terminal button	0.07083	0.93149
microsome	0.06819	0.18336
membrane raft	0.06403	0.42891
intermediate filament	0.06081	0.99041
ruffle membrane	0.05253	1
external side of plasma membrane	0.05008	0.52177
cilium	0.0472	1
neuron projection	0.044	0.75348
endoplasmic reticulum membrane	0.04115	0.14166
late endosome	0.03964	1
endosome membrane	0.03896	0.75348
focal adhesion	0.03864	0.75771
centrosome	0.0357	0.78588
acetylcholine-gated channel complex	-0.03443	1
actin filament	-0.03443	1
Ada2/Gcn5/Ada3 transcription activator complex	-0.03443	1
aggresome	-0.03443	1
anaphase-promoting complex	-0.03443	1
anchored to external side of plasma membrane	-0.03443	1
anchored to membrane	-0.03443	1
anchored to plasma membrane	-0.03443	1
apical junction complex	-0.03443	1
apical part of cell	-0.03443	1

## Sheet: Table S7. Disgenet_Common
Table SVII. Genes related with endometriosis in DisGeNet database.
Target	DiseaseNet	Common
ABCB1	ABCB6	AR
ABCC2	ABCC4	BAX
ANO1	ABCC9	BCL2L1
AR	ABI3BP	CASP3
BAK1	ACACA	CXCL8
BAX	ACE	CYP1B1
BCHE	ACKR3	CYP3A4
BCL2L1	ACP1	EGFR
BIK	ACTA2	ESR1
BMF	ACTB	IFNG
BOK	ACTN1	IL4
CASP3	ACTN4	MAOA
CASP7	ACVR1B	MAOB
CASP8	ACVR2B	MAPK1
CASP9	ADA	NFE2L2
CTSL	ADAM17	NFKBIA
CXCL8	ADAR	NOS2
CYP1B1	ADIPOQ	PTGS2
CYP3A4	ADM	RELA
EGFR	ADRA1A	SOD1
ESR1	ADRA2B	STAT3
HEXA	AFAP1	TERT
HEXB	AFAP1-AS1	TLR4
HMGCR	AGBL4	TP53
IFNB1	AGFG2	TRPV1
IFNG	AGR2	UGT1A1
IL4	AGRP
IRF3	AGT
MAOA	AGTR1
MAOB	AGTR2
MAPK1	AHR
MAPT	AHRR
MICAL1	AHSA1
MPG	AHSG
NFE2L2	AIF1
NFKBIA	AIMP2
NOS2	AKAP13
PDE5A	AKR1B1
PTGS2	AKR1C1
RELA	AKR1C2
RORC	AKR1C3
SOD1	AKT1
STAT3	ALB
TERT	ALOX15
TLR4	ALPI
TP53	ALPP
TRPA1	AMH
TRPV1	AMHR2
TRPV4	ANG
TXNRD1	ANGPT1
UGT1A1	ANGPT2
	ANK1
	ANKH
	ANKRD1
	ANO4
	ANTXR2
	ANXA1
	ANXA2
	APEX1
	APOA2
	APOE
	AQP1
	AQP2
	AQP5
	AQP9
	AR
	AREG
	ARG1
	ARHGAP28
	ARID1A
	ARID3B
	ARNT
	ARSD
	ARTN
	ARX
	ASTN2
	ATAD3A
	ATG3
	ATM
	AXIN1
	AXL
	B2M
	BAG6
	BAX
	BCAR1
	BCAR3
	BCL10
	BCL2
	BCL2L1
	BCL2L11
	BCL6
	BDNF
	BECN1
	BEND5
	BIRC2
	BIRC3
	BIRC5
	BMP4
	BMP7
	BMPR1B
	BMS1
	BNC2
	BRAF
	BRCA1
	BRCA2
	BRD2
	BRD8
	BRS3
	BSG
	BTF3P11
	BTG1
	BTK
	C1R
	C2
	C3
	C5
	C9
	CA2
	CAB39L
	CACNA1A
	CACYBP
	CADM1
	CADM2
	CALCA
	CALD1
	CALHM3
	CAPN14
	CAPN7
	CARD11
	CARM1
	CASP3
	CASR
	CAT
	CCDC144NL-AS1
	CCDC170
	CCDC22
	CCDC80
	CCL1
	CCL11
	CCL14
	CCL16
	CCL17
	CCL19
	CCL2
	CCL21
	CCL22
	CCL25
	CCL5
	CCN1
	CCN2
	CCNB1
	CCND1
	CCNE1
	CCNE2
	CCR1
	CCR2
	CCR5
	CCR7
	CCR8
	CCR9
	CD14
	CD163
	CD19
	CD200
	CD200R1
	CD226
	CD274
	CD36
	CD40LG
	CD44
	CD47
	CD48
	CD55
	CD68
	CD74
	CD79A
	CD82
	CD86
	CDC42
	CDC6
	CDC73
	CDH1
	CDH15
	CDH3
	CDK1
	CDK4
	CDK6
	CDKN1A
	CDKN1B
	CDKN2A
	CDKN2B-AS1
	CDKN3
	CDX1
	CEBPA
	CETP
	CFD
	CFI
	CFL1
	CFTR
	CHD5
	CHRM3
	CHST3
	CHUK
	CIB1
	CKS1B
	CKS1BP7
	CLCN3
	CLDN1
	CLDN11
	CLDN3
	CLDN4
	CLDN5
	CLDN7
	CLOCK
	CNIH3
	CNR1
	COL12A1
	COL18A1
	COL1A1
	COMT
	COPS2
	COX2
	CPB2
	CPM
	CPP
	CRABP2
	CREB1
	CREB3L1
	CRH
	CRHR1
	CRHR2
	CRISPLD2
	CRK
	CRMP1
	CRP
	CSE1L
	CSF1
	CSF1R
	CSF2
	CSF3
	CSK
	CTCF
	CTH
	CTHRC1
	CTLA4
	CTNNB1
	CX3CL1
	CX3CR1
	CXCL1
	CXCL10
	CXCL12
	CXCL13
	CXCL14
	CXCL16
	CXCL5
	CXCL8
	CXCL9
	CXCR1
	CXCR2
	CXCR3
	CXCR4
	CXCR6
	CYB5A
	CYP11A1
	CYP17A1
	CYP19A1
	CYP1A1
	CYP1A2
	CYP1B1
	CYP21A2
	CYP26A1
	CYP2B6
	CYP2C19
	CYP2R1
	CYP3A4
	CYP4F3
	DAPK1
	DAPK2
	DCLRE1C
	DCN
	DCSTAMP
	DCTN4
	DCTN6
	DDX5
	DECR1
	DEFB4A
	DEFB4B
	DENR
	DEPP1
	DHRS11
	DICER1
	DIO2
	DKK1
	DLL4
	DLX3
	DLX5
	DNM1L
	DNMT1
	DNMT3A
	DNMT3B
	DNMT3L
	DOCK11
	DOK1
	DPP4
	DPP6
	DPYSL2
	DRD2
	DUSP1
	DUSP2
	DUSP6
	EBAG9
	EDN1
	EDNRA
	EGF
	EGFR
	EGR1
	EIF1
	EIF3E
	EIF4EBP1
	ELAVL1
	ELAVL2
	EMSLR
	EMX2
	ENO1
	ENPP1
	ENPP3
	ENTPD1
	EPCAM
	EPHA3
	EPHB2
	EPHB4
	EPO
	EPOR
	ERBB2
	ERCC1
	ERCC2
	ERCC6
	ERRFI1
	ERVW-1
	ESR1
	ESR2
	ESRRB
	ETS1
	EXTL3
	EZH2
	EZR
	F2
	F2R
	F2RL1
	F3
	FAM180A
	FAM215A
	FANCD2
	FAS
	FASLG
	FBLN1
	FBN1
	FCGR3A
	FCGR3B
	FCRL3
	FEN1
	FGA
	FGD6
	FGF1
	FGF2
	FGF9
	FGFR2
	FJX1
	FKBP4
	FKBP5
	FLT1
	FMO2
	FN1
	FOS
	FOXA2
	FOXD3
	FOXM1
	FOXO1
	FOXO3
	FOXP1
	FOXP2
	FOXP3
	FPR1
	FPR2
	FSCN1
	FSHB
	FSHR
	FST
	FZD7
	GABPA
	GALNT3
	GALNT6
	GALT
	GATA2
	GATA3
	GATA6
	GATM
	GBA
	GC
	GDF3
	GDNF
	GFM1
	GH1
	GHRH
	GHRHR
	GJA1
	GJB2
	GLI1
	GLI3
	GNRH1
	GNRHR
	GORASP1
	GPBAR1
	GPER1
	GPNMB
	GPR42
	GPX3
	GPX4
	GRAP2
	GRB2
	GREB1
	GREM1
	GRIN2D
	GSK3B
	GSTK1
	GSTM1
	GSTM2
	GSTP1
	GSTT1
	GTF2H1
	H2AX
	H3-4
	H3P10
	H3P23
	H4-16
	H4C1
	H4C11
	H4C12
	H4C13
	H4C14
	H4C15
	H4C2
	H4C3
	H4C4
	H4C5
	H4C6
	H4C8
	H4C9
	HAND2
	HAS1
	HBEGF
	HCK
	HDAC1
	HDAC2
	HDAC3
	HDAC9
	HERC5
	HES5
	HEY1
	HGF
	HIF1A
	HK1
	HLA-B
	HLA-C
	HLA-DPB1
	HLA-DQB1
	HLA-DRB1
	HLA-G
	HMGA1
	HMGA2
	HMGB1
	HNF1B
	HNF4A
	HNRNPA3P1
	HOXA10
	HOXA11
	HOXA11-AS
	HOXA13
	HOXB4
	HP
	HPGD
	HPGDS
	HPRT1
	HPSE
	HS3ST3B1
	HSD11B2
	HSD17B1
	HSD17B13
	HSD17B2
	HSD17B3
	HSD17B7
	HSD3B1
	HSD3B2
	HSH2D
	HSPA14
	HSPA4
	HSPD1
	HTC2
	HTRA1
	HYAL2
	IAPP
	ICAM1
	ID2
	IDO1
	IER3
	IFI27
	IFIT1
	IFNA1
	IFNA13
	IFNG
	IFNGR1
	IGF1
	IGF1R
	IGFBP1
	IGFBP3
	IGFBP6
	IGFBP7
	IGSF8
	IHH
	IL10
	IL11
	IL12B
	IL12RB1
	IL13
	IL15
	IL16
	IL17A
	IL17D
	IL18
	IL18R1
	IL1A
	IL1B
	IL1R1
	IL1R2
	IL1RAP
	IL1RN
	IL2
	IL21
	IL22
	IL23A
	IL27
	IL2RA
	IL2RB
	IL32
	IL33
	IL34
	IL37
	IL4
	IL6
	IL7
	IL7R
	IL9
	ILK
	IMPA2
	INHA
	INHBA
	INSR
	INTU
	IPO13
	IRS2
	ISG20
	ITGA2
	ITGA5
	ITGAM
	ITGAV
	ITGB1
	ITGB3
	ITGB3BP
	ITGB8
	JAK1
	JUN
	KCNQ1
	KCNQ2
	KDR
	KHDRBS1
	KIF20A
	KIFAP3
	KIR2DL1
	KIR2DL3
	KIR2DL4
	KIR2DS1
	KIR2DS5
	KIR3DL1
	KIR3DL2
	KISS1
	KISS1R
	KITLG
	KLF10
	KLF11
	KLF13
	KLF9
	KLRC1
	KLRC4-KLRK1
	KLRK1
	KNG1
	KRAS
	KRT20
	L1CAM
	LAMB1
	LAMC2
	LAMC3
	LBR
	LEFTY2
	LEP
	LEPR
	LGALS1
	LGALS3
	LGALS4
	LGALS9
	LGR5
	LHB
	LHCGR
	LIF
	LILRB1
	LILRB2
	LIMK1
	LINC00261
	LINC00339
	LINC00861
	LINC01541
	LINC01672
	LINC02210-CRHR1
	LINC02605
	LIPC
	LIPE
	LIPG
	LMLN
	LMNB1
	LMOD1
	LOC110386951
	LOC110806263
	LOX
	LOXL1
	LOXL4
	LPA
	LPAR2
	LPAR3
	LRRK2
	LTA
	LTB4R
	LTB4R2
	LTF
	LYN
	MAGT1
	MAK16
	MALAT1
	MANEA
	MAOA
	MAOB
	MAP1LC3B
	MAP2
	MAP2K1
	MAP2K7
	MAP3K4
	MAPK1
	MAPK14
	MAPK3
	MAPK8
	MAS1
	MAT2A
	MBL2
	MBL3P
	MDK
	MDM2
	MECP2
	MED1
	MED14
	MED16
	MED17
	MED4
	MEGF8
	MEIS1
	MET
	METTL7A
	MIA
	MIF
	MIR100
	MIR106A
	MIR10B
	MIR1185-1
	MIR122
	MIR126
	MIR132
	MIR135B
	MIR139
	MIR141
	MIR142
	MIR143
	MIR145
	MIR146B
	MIR148A
	MIR154
	MIR17
	MIR181C
	MIR182
	MIR183
	MIR191
	MIR195
	MIR196A2
	MIR196B
	MIR200A
	MIR200B
	MIR200C
	MIR204
	MIR205
	MIR20A
	MIR21
	MIR210
	MIR214
	MIR216A
	MIR22
	MIR23B
	MIR27B
	MIR2861
	MIR29C
	MIR30A
	MIR30C1
	MIR30C2
	MIR31
	MIR33A
	MIR33B
	MIR342
	MIR34A
	MIR34B
	MIR3613
	MIR363
	MIR370
	MIR375
	MIR378A
	MIR381
	MIR449B
	MIR451A
	MIR4634
	MIR483
	MIR488
	MIR503
	MIR520G
	MIR542
	MIR543
	MIR629
	MIRLET7B
	MIRLET7D
	MLH1
	MME
	MMP1
	MMP12
	MMP13
	MMP14
	MMP2
	MMP24
	MMP3
	MMP7
	MMP9
	MNAT1
	MPO
	MR1P1
	MRC1
	MS4A1
	MSH2
	MSH6
	MSI1
	MSMB
	MST1
	MST1R
	MSTN
	MTA1
	MTA2
	MTCO2P12
	MTOR
	MUC1
	MUC16
	MUC17
	MUC2
	MUC4
	MYB
	MYC
	MYDGF
	MYL9
	MYLIP
	NAA16
	NAALADL2
	NANOG
	NAT2
	NCAM1
	NCOA1
	NCOA6
	NCOR1
	NCR3
	NDNF
	NDRG1
	NECTIN1
	NECTIN3
	NECTIN4
	NEDD4L
	NEFM
	NFE2L2
	NFKB1
	NFKBIA
	NGF
	NGFR
	NHS
	NINJ1
	NLRC5
	NME1
	NOD1
	NOS1
	NOS2
	NOS3
	NOTCH1
	NOTCH4
	NPTX2
	NR0B2
	NR1D2
	NR1I2
	NR2C1
	NR2C2
	NR2F2
	NR2F6
	NR3C1
	NR3C2
	NR4A1
	NR5A1
	NR5A2
	NRAS
	NRN1
	NRP1
	NT5E
	NTF3
	NTF4
	NTRK2
	NTRK3
	NUDT6
	NUP210
	NUP62
	OGG1
	OLFM4
	OPRM1
	OR9Q1
	OSR2
	OXTR
	P2RX3
	P2RX5
	P2RY6
	PAEP
	PAK1
	PAK4
	PAPPA
	PARP1
	PAX2
	PAX8
	PCAT1
	PCNA
	PDCD1
	PDCD4
	PDCD6
	PDE1C
	PDGFA
	PDGFRA
	PDGFRB
	PDIA3
	PDIK1L
	PDLIM5
	PEA15
	PF4
	PF4V1
	PGF
	PGR
	PGR-AS1
	PHB
	PHB2
	PIK3CA
	PIK3CB
	PIK3CD
	PIK3CG
	PLA2G2A
	PLAU
	PLCB1
	PLCB4
	PLG
	PLK1
	PLXNC1
	PLXND1
	PNN
	PNO1
	POLD1
	POLDIP2
	POLE
	PON1
	POSTN
	POU5F1
	POU5F1P3
	POU5F1P4
	PPARA
	PPARG
	PPARGC1A
	PPIG
	PPP1R2C
	PPP2R1A
	PPP5C
	PPT1
	PRELP
	PRKCA
	PRKCB
	PRL
	PRLR
	PROK1
	PROM1
	PRRT2
	PSEN1
	PSMD10
	PSMD2
	PSMD9
	PTBP1
	PTEN
	PTGER2
	PTGER4
	PTGES
	PTGFR
	PTGS2
	PTN
	PTPN22
	PTPRC
	PTPRD
	PVR
	QRSL1
	RAF1
	RARB
	RARRES1
	RARRES2
	RASA1
	RASGRP1
	RASL11A
	RASSF2
	RB1
	RBFOX1
	RBM45
	RBMS3
	RBP1
	RBPJ
	RELA
	REM1
	REN
	RETN
	RFLNA
	RGPD2
	RGS4
	RGS6
	RHOC
	RHOF
	RHOG
	RMDN1
	RMDN2
	RMDN3
	RNASE3
	RNF19A
	RNF34
	RNU1-1
	RNU1-4
	ROBO4
	ROCK1
	RORB
	ROS1
	RUNX1
	RUNX3
	RXFP1
	RXRA
	S100A1
	S100A4
	S100A6
	S100B
	S1PR1
	S1PR2
	SAG
	SALL4
	SARDH
	SCGB3A1
	SCN11A
	SDC1
	SDC4
	SELE
	SELENOP
	SELL
	SEMA3C
	SEMA3E
	SEMA6A
	SERPINA1
	SERPINB2
	SERPINE1
	SERPINF1
	SERPING1
	SERPINH1
	SFRP1
	SFRP2
	SFXN1
	SGPP2
	SH2D1A
	SH3BP4
	SHC1
	SIRPA
	SIRT1
	SKAP1
	SKP2
	SLC16A6
	SLC1A1
	SLC20A1
	SLC22A23
	SLC2A1
	SLC2A3
	SLC2A4
	SLC33A1
	SLC38A1
	SLC40A1
	SLC52A1
	SLC6A4
	SLC7A8
	SLCO6A1
	SLIT2
	SLIT3
	SLPI
	SMAD2
	SMAD3
	SMAD4
	SMARCA1
	SMARCC1
	SMOC2
	SMPDL3A
	SNAI1
	SNAI2
	SNCG
	SOD1
	SOD2
	SOX15
	SOX2
	SOX9
	SPARCL1
	SPHKAP
	SPP1
	SQSTM1
	SRA1
	SRC
	SRD5A1
	SRD5A2
	SRL
	SRR
	SRRM2
	SRY
	SST
	SSTR1
	SSTR4
	ST6GALNAC1
	STAR
	STAT3
	STAT4
	STAT6
	STC1
	STC2
	STIP1
	STMN1
	STN1
	STS
	STX5
	SUCLG2
	SULF2
	SULT1A1
	SULT1E1
	SULT2A1
	SYBU
	SYNE1
	SYNJ2
	SYP
	SYT1
	TAC1
	TACR1
	TACSTD2
	TAGLN
	TBPL2
	TBX21
	TCF21
	TCF3
	TDGF1
	TECR
	TEK
	TERF1
	TERT
	TET1
	TET3
	TFDP1
	TFF3
	TGFB1
	TGFB1I1
	TGFB2
	TGFB3
	TGFBI
	TGFBR1
	THBS1
	THOC6
	THRA
	THY1
	TICAM2
	TIMP1
	TIMP2
	TIMP3
	TIMP4
	TLR2
	TLR3
	TLR4
	TMED7
	TMED7-TICAM2
	TMOD3
	TMPRSS13
	TNC
	TNF
	TNFRSF11B
	TNFRSF1A
	TNFRSF1B
	TNFRSF21
	TNFRSF6B
	TNFSF10
	TNFSF13B
	TNS1
	TOB1
	TP53
	TPM3
	TPT1
	TREM2
	TRERF1
	TRH
	TRO
	TRPC6
	TRPV1
	TSHZ1
	TSLP
	TSPO
	TTC39B
	TWIST1
	TXN
	TXNIP
	TYK2
	TYROBP
	UCHL1
	UCN
	UCN2
	UCN3
	UGT1A1
	UGT2B28
	ULBP2
	ULBP3
	USF2
	USP10
	USP17L2
	UST
	UTF1
	UTRN
	UTS2
	VAV1
	VCAM1
	VCAN
	VDR
	VEGFA
	VEGFC
	VEZT
	VIM
	VIP
	VPS11
	VPS53
	VTA1
	VTN
	VWF
	WNK1
	WNT3A
	WNT4
	WNT7A
	WT1
	XBP1
	XRCC1
	XRCC3
	XRCC4
	YAP1
	YBX1
	YWHAZ
	ZEB1
	ZFP36
	ZFP42
	ZHX2
	ZNF217
	ZNF366
	ZNRD2
	ZP3
